# Supplementary material for: In eHealth in India today, the nature of work, the challenges and the finances: an interview-based study
Source: BMC Med Inform Decis Mak. 2014 Jan 6;14:1. doi: 10.1186/1472-6947-14-1 (PMC3893581; doi:10.1186/1472-6947-14-1)
Supplement: Additional file 2 — For 21 organizations, the nature of the organization, the categories of work undertaken, its sources of funding and comments about its financial stability. [file 1472-6947-14-1-S2.pdf]

**Additional File 2.**

|    | Case                                                      | Type of work <sup>s</sup> | Beneficiary* | Source of funding |                                                    |                   |                      |                 | Financial stability of the programme, and related comments.                                                                                                       |
|----|-----------------------------------------------------------|---------------------------|--------------|-------------------|----------------------------------------------------|-------------------|----------------------|-----------------|-------------------------------------------------------------------------------------------------------------------------------------------------------------------|
|    |                                                           |                           |              | Donor             | Government                                         | Cross-subsidy     | Revenue <sup>#</sup> | Venture capital |                                                                                                                                                                   |
| 1. | Private hospital and its associated non-profit foundation | Cooperation of S and V    | N            |                   | Yes (existing hospitals)                           | Yes               | Yes                  |                 | Financially stable. A successful scale up in private-public partnership with a state government. The government is contemplating taking this programme all-India. |
| 2. | Government hospital                                       | S, E                      | Both         |                   | Yes                                                |                   |                      |                 | Stable, dependent on government funding                                                                                                                           |
| 3. | Non-profit                                                | S, I, V                   | N            | Yes               | Yes (ASHA programme)                               |                   | Yes (experimental)   |                 | Dependent on donor funding. Planning expansion to one other state. Cannot go further due to lack of funds.                                                        |
| 4. | Non-profit hospital                                       | S, V                      | N            |                   |                                                    | Yes (at start up) | Yes                  |                 | Self-financing if good patient volume. Another state has copied this model.                                                                                       |
| 5. | Non-profit hospital                                       | S                         | N            | Yes               | Yes (doctors in government primary health centres) | Yes               | Yes                  |                 | Self-financing if good patient volume.                                                                                                                            |
|    |                                                           | V                         | N            | Yes               | Yes (satellite)                                    | Yes               |                      |                 |                                                                                                                                                                   |
| 6. | For-profit hospital                                       | E, V                      | N            | Yes               | Yes (satellite)                                    | Yes               |                      |                 | The work cannot be scaled up without funding.                                                                                                                     |
| 7. | For-profit hospital                                       | S, E                      | Both         |                   | Yes (satellite + others)                           | Yes               |                      |                 | Sustainable only as a CSR activity.                                                                                                                               |
| 8. | Non-profit hospital                                       | V                         | N            | Yes               | Yes                                                | Yes               | Yes                  |                 | Constant struggle for donations                                                                                                                                   |

|     |                                                     |      |        |     |                                                                    |     |     |     |                                                                                                                                                       |
|-----|-----------------------------------------------------|------|--------|-----|--------------------------------------------------------------------|-----|-----|-----|-------------------------------------------------------------------------------------------------------------------------------------------------------|
|     |                                                     |      |        |     | (satellite)                                                        |     |     |     | generates uncertainty about the programme's future.                                                                                                   |
| 9.  | For-profit hospital                                 | S    | Near U |     |                                                                    |     | Yes | Yes | Business model is still evolving.                                                                                                                     |
| 10. | For-profit company                                  | S    | U      |     |                                                                    |     | Yes | Yes | Business model is still evolving.                                                                                                                     |
| 11. | International non-profit                            | E, D | N      | Yes | Yes (ASHA programme)                                               |     |     |     | It rides on the ASHA programme. It is not interested or capable of enlarging scale on its own.                                                        |
| 12. | International non-profit                            | S    | N      | Yes |                                                                    |     | Yes |     |                                                                                                                                                       |
|     |                                                     | S, D | N      | Yes | Yes                                                                |     |     |     | TB follow up programme rides on a government programme (a belief that for scale up, the government should fund and the private sector should deliver) |
| 13. | Not-profit foundation linked to for-profit hospital | S, E | Near U |     | Yes (satellite)                                                    | Yes | Yes |     | Only sustainable as a CSR programme of the hospital.                                                                                                  |
| 14. | Non-profit hospital                                 | S, V | N      | Yes | Yes (satellite)                                                    | Yes | Yes |     | Cannot expand without further funding.                                                                                                                |
| 15. | For-profit company                                  | I    | U      |     |                                                                    |     | Yes | Yes | Business model is still evolving.                                                                                                                     |
| 16. | Non-profit research organization                    | I    | Both   | Yes | Yes (existing programme of one state government for one programme) |     |     |     | Business model is still evolving.                                                                                                                     |
| 17. | Non-profit hospital                                 | D    | Both   | Yes | Yes (mainly                                                        |     |     |     | Very large scale due to GoI                                                                                                                           |

|     |                                       |   |          |     |                                |  |                                            |  |                                                                                                                                         |
|-----|---------------------------------------|---|----------|-----|--------------------------------|--|--------------------------------------------|--|-----------------------------------------------------------------------------------------------------------------------------------------|
|     | and foreign non-profit                |   |          |     | existing infrastructure )      |  |                                            |  | involvement.                                                                                                                            |
| 18. | Non-profit organization               | I | N        | Yes | Yes (ASHA programme)           |  | Yes                                        |  | Business model is still evolving.                                                                                                       |
| 19. | Non-profit academic institute         | D | N        | Yes | Yes (existing infrastructure ) |  |                                            |  | A pilot study not intended to be scaled up. A belief that the government would have to support the programme if it had to be scaled up. |
| 20. | Non-profit organization               | I | Both     | Yes | Use of logo                    |  | Yes (corporate sponsorship + user charges) |  | Corporate sponsorship enabled large scale up.                                                                                           |
| 21. | Non-profit company                    | D | Mainly N | Yes | Yes (ASHA programme)           |  |                                            |  | The programme cannot be scaled up without government funding.                                                                           |
| 22. | International non-profit organization | D | U        | Yes |                                |  |                                            |  | The programme cannot be scaled up without government funding.                                                                           |

\*Beneficiary could be Non-urban (N), Urban (U) or both.

# Revenue could be from patients or other sources such as advertising.

§ Abbreviations for the categories of work

S Stationary telemedicine

V Telemedicine van

E Education of health professionals or activists

I IT-enabled health information for patients

D Data collection or monitoring
